# Supplementary material for: Unique synapomorphies and high diversity in South American Raji-related Epstein-Barr virus genomes
Source: PubMed Central journal article supplement (PMC10629697; doi:10.1590/0074-02760230122), 2023-11-03
Supplement: 1678-8060-mioc-118-e230122-s.pdf [file 1678-8060-mioc-118-e230122-s.pdf]

TABLE  
List of primers used in Sanger sequencing

| Primer pair     | Primer name | Sequence                 | Genome coordinate | Product in base pairs | Annealing temperature in Celsius |
|-----------------|-------------|--------------------------|-------------------|-----------------------|----------------------------------|
| 1 <sup>a</sup>  | 39911       | CTGGTTCTGGGGCTCCTCT      | 39911<br>145435   | 221                   | 56                               |
|                 | 40112       | CAGGTCGGACTAGCGGATG      | 40112             |                       |                                  |
| 2 <sup>a</sup>  | 40944       | CACCCTTCCTCCTTCCGTTT     | 40944             | 482                   | 54.1                             |
|                 | 41405       | AAATCACCCCAAGTCCCCTTC    | 41405             |                       |                                  |
| 3 <sup>a</sup>  | 48386       | CATTCAAGTGGATGTGGTACCG   | 48386             | 242                   | 52.6                             |
|                 | 48608       | TGAAACACTTGTAGGCCCGG     | 48608             |                       |                                  |
| 4 <sup>a</sup>  | 63017       | CGGCCCGGCGTCTAAATATT     | 63017             | 290                   | 54.7                             |
|                 | 63287       | GAACGGGTCACTCTGCTTGA     | 62287             |                       |                                  |
| 5 <sup>a</sup>  | 64555       | CGGAGATTGAGAGTGACATGG    | 64555             | 290                   | 52.1                             |
|                 | 64971       | GTGGCTGTTGATCATCCTCAT    | 64971             |                       |                                  |
| 6 <sup>a</sup>  | 87439       | CAGTGAAGCGCACAAATGTTA    | 87439             | 306                   | 51                               |
|                 | 87721       | TATTTGGCTGTGACACTGACG    | 87721             |                       |                                  |
| 7 <sup>a</sup>  | 88592       | GTCTCAAGATCCTGTGCATGG    | 88803             | 452                   | 52.6                             |
|                 | 89023       | CCTGTGCTTCAGCAGTAGCTT    | 88808             |                       |                                  |
| 8 <sup>a</sup>  | 100708      | AATTCTTTTGGAGCCAGGTGT    | 100708            | 355                   | 51.6                             |
|                 | 101042      | TTTGGACACCTCATGAAGACC    | 101042            |                       |                                  |
| 9 <sup>a</sup>  | 105498      | AATTCGTAGAGCCACCAAGTG    | 105498            | 364                   | 52                               |
|                 | 105841      | CAGATTTCCAGCCCTATGTCC    | 105841            |                       |                                  |
| 10 <sup>a</sup> | 108015      | CTCCTCCGTTTTACCGATGAC    | 108015            | 426                   | 52.2                             |
|                 | 108421      | GGTAAAGGGGGAGGCATAAC     | 108421            |                       |                                  |
| 11 <sup>a</sup> | 136417      | ATGCTATCAGGTAACGCAGGA    | 136417            | 470                   | 52.8                             |
|                 | 136867      | TCTCTTTTCCGCTTGTGGAT     | 136867            |                       |                                  |
| 12 <sup>a</sup> | 143795      | TGGGTGGAGCTAGGTAGGATT    | 143795            | 656                   | 54.2                             |
|                 | 144430      | TGTGTACCCAGGGTGAGAGAC    | 144430            |                       |                                  |
| 13 <sup>a</sup> | 168997      | CTCTCAAGGTCGTGTCCATC     | 168997            | 679                   | 52.2                             |
|                 | 169655      | CCTCCACTTTTTCCAGGAATG    | 169655            |                       |                                  |
| 14 <sup>b</sup> | 60125       | AACAGGCGGGCGAATGTGTAAT   | 60125             | 1272                  | 56.2                             |
|                 | 61397       | ACCTTTCATCCGAACCTCAGGT   | 61397             |                       |                                  |
| 15 <sup>b</sup> | 96177       | TTGCATTGGCTGCAAAGGGG     | 96177             | 614                   | 56.4                             |
|                 | 96791       | CACCACGTCCACGACCTCTC     | 96791             |                       |                                  |
| 16 <sup>b</sup> | 157382      | TCAGCACCATGTTCTGCCTCTT   | 157382            | 507                   | 55.9                             |
|                 | 157889      | TTCGTGACCAACACAACCGT     | 157889            |                       |                                  |
| 17 <sup>b</sup> | 51199       | CCGAAATAGGGCCTTGCCATCAAT | 51199             | 1046                  | 56.8                             |
|                 | 52245       | ATTCAGGACTACCTGCGCGACTT  | 52245             |                       |                                  |

a: reference: this work; b: reference number 33; A: adenine; C: cytosine; G: guanine; T: thymine.
